# Supplementary material for: Electricity generation from an inorganic sulfur compound containing mining wastewater by acidophilic microorganisms
Source: PubMed Central journal article supplement — Res Microbiol. 2016 Sep;167(7):568–75. doi: 10.1016/j.resmic.2016.04.010 (PMC5015573; doi:10.1016/j.resmic.2016.04.010), 2016-09

**Electricity generation from inorganic sulfur containing mining  
wastewater by acidophilic microorganisms**

Gaofeng Ni, Stephan Christel, Pawel Roman, Zhen Lim Wong,  
Martijn F. M. Bijmans & Mark Dopson\*

**Supplemental Files**

**Supplemental File 1.** Image of the MFCs used in this study.

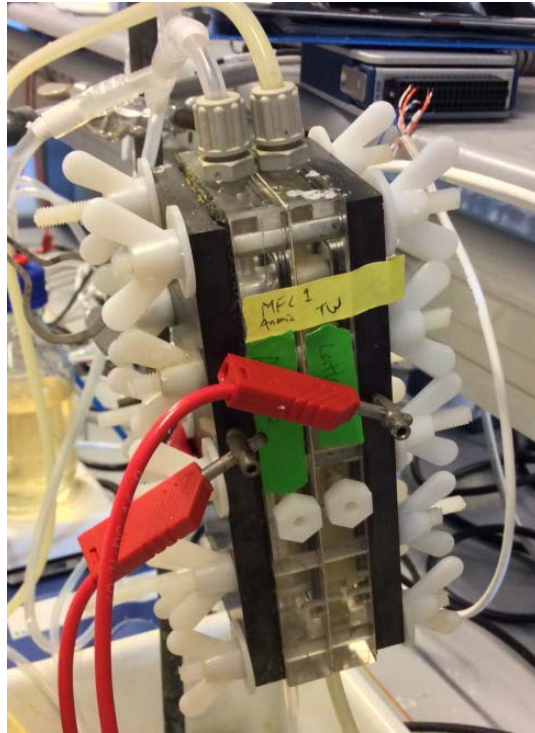

**Supplemental File 2.** Anode (▲) and cathode (●) potentials and whole cell voltage (■) of MFCs inoculated with the Kristineberg acid mine drainage stream sediment and fed with 5 mM tetrathionate (A) and a mixture of 3 mM tetrathionate + 3 mM thiosulfate (B). Vaasa acid sulfate soil inoculated MFCs were fed with 5 mM tetrathionate (C) or 5 mM thiosulfate (D). Addition of extra substrate is marked by arrows.

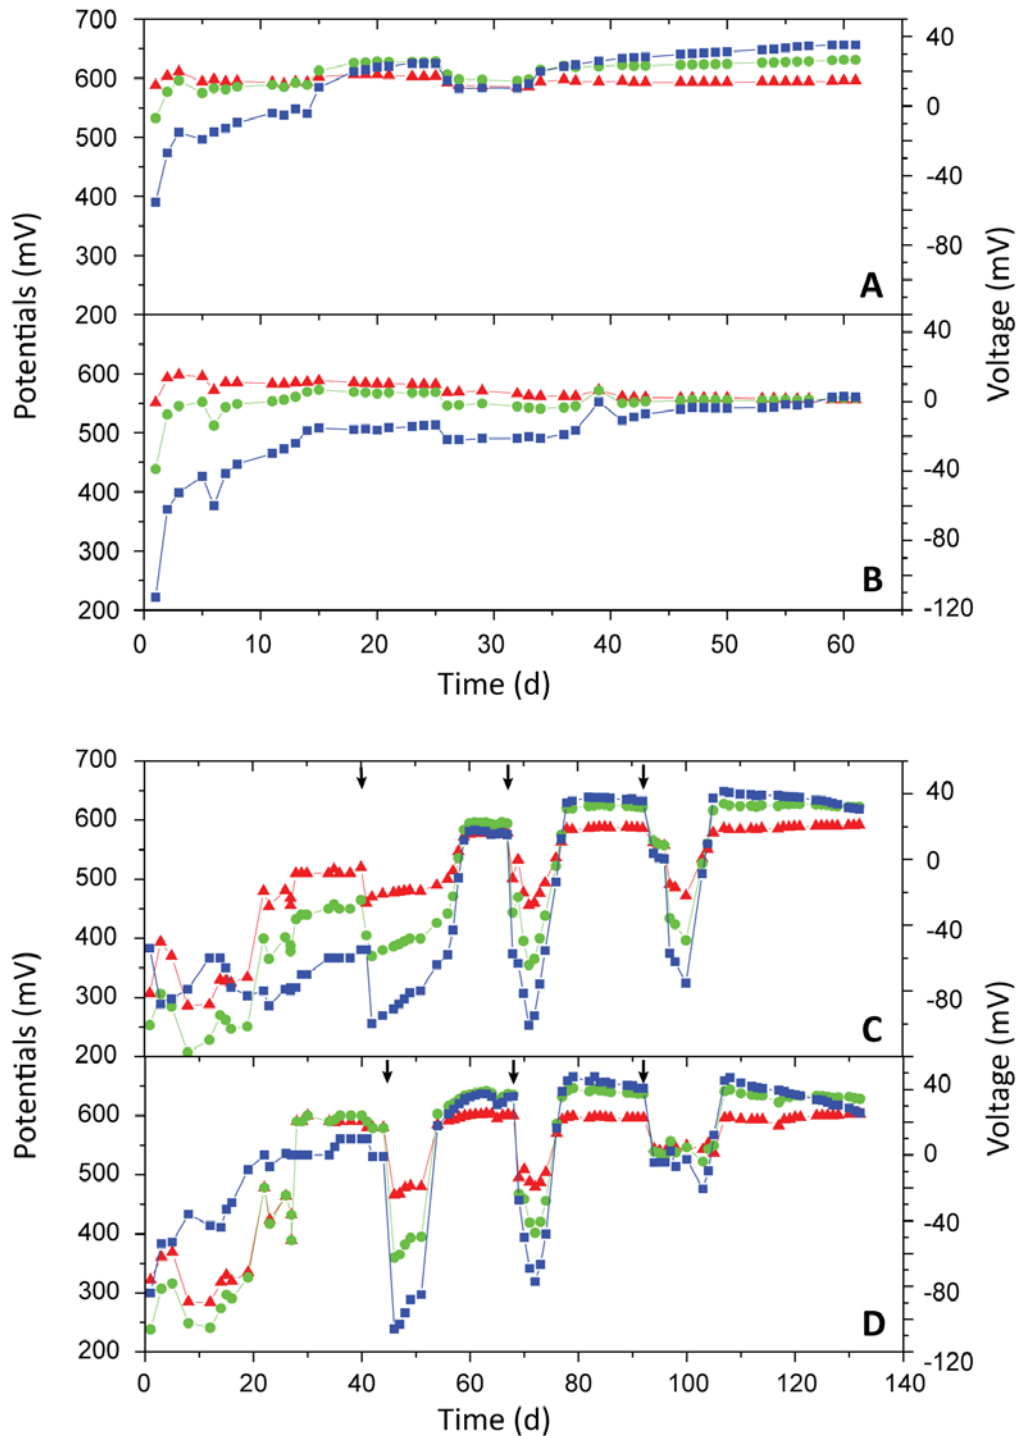

**Supplemental File 3.** Pie charts of the dominant members of the microbial community from the tetrathionate fed, cation exchange membrane MFCs inoculated with the Kristineberg acid mine drainage stream sediment (top) and Vaasa acid sulfate soil (bottom). Unidentified populations were <0.1% of the 16S rRNA gene reads.

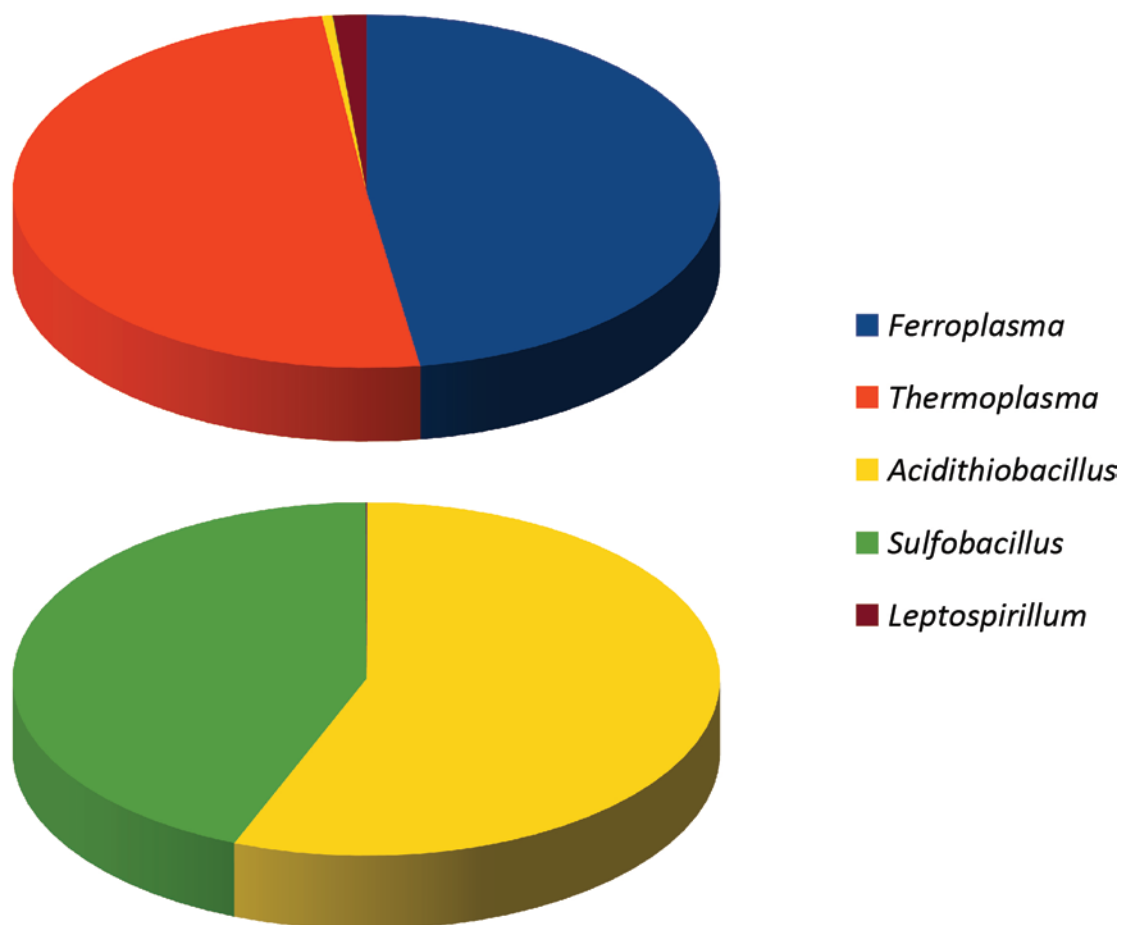

**Supplemental File 4.** Cyclic voltammograms for the cation exchange membrane MFC in the presence of mineral salts medium plus tetrathionate and corresponding abiotic control (MFC2); anion exchange membrane with 100% process wastewater with no additional tetrathionate and corresponding abiotic control (MFC3); and anion exchange membrane with mineral salts medium plus tetrathionate and corresponding abiotic control (MFC4).

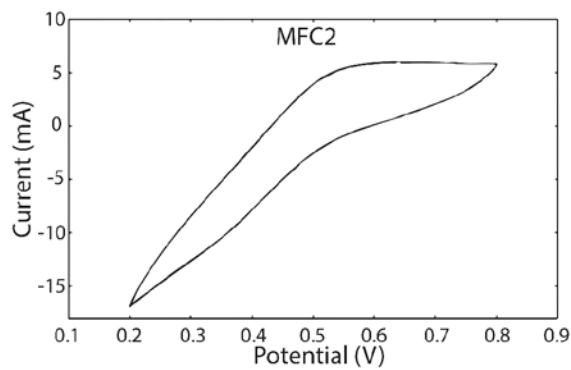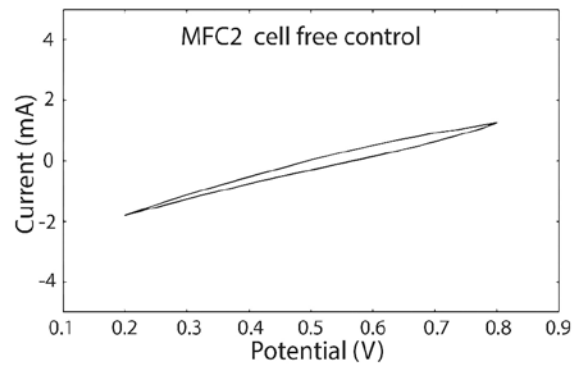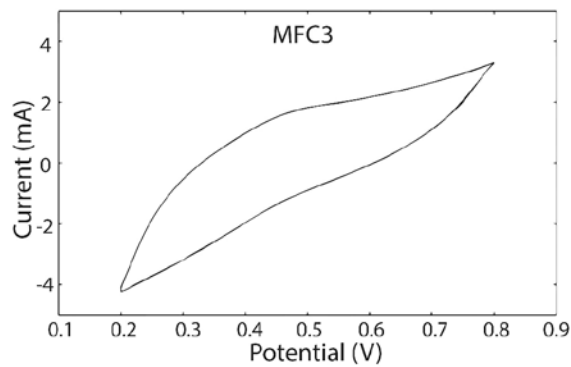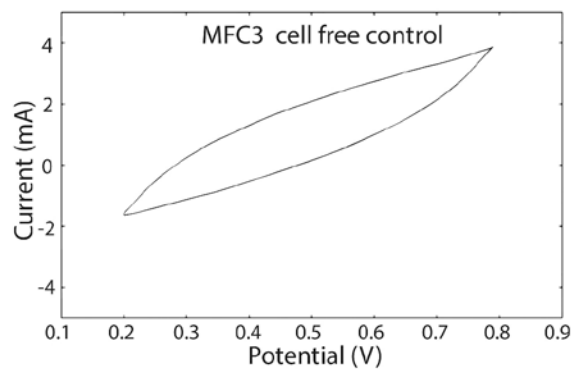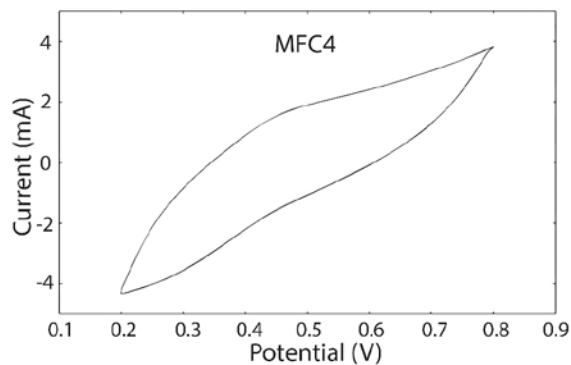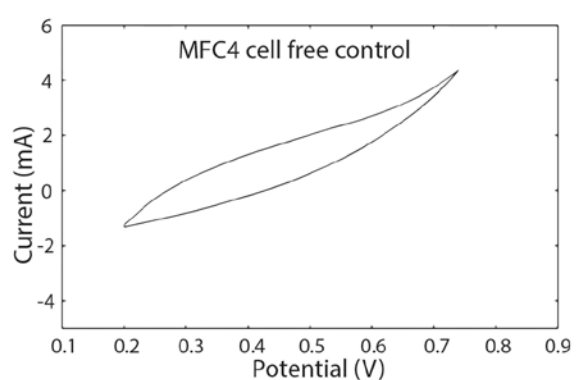

Supplement: mmc1.pdf [file mmc1.pdf]
